# Supplementary material
Source: publisher figshare collection journal article supplement (https://tandf.figshare.com/ndownloader/files/20763633)
Supplement: Supplementary file 1 [file 20763633]

## Supplementary Materials

### SM1. Treatment and Assignment

DATE: \_\_\_\_\_  
FROM: Development Partners and Chief \_\_\_\_\_  
TO: Village Development Committee  
RE: Development Project in \_\_\_\_\_ Village

Dear Chair Village Development Committee Overseeing \_\_\_\_\_ Village:

We write to inform you that Chief \_\_\_\_\_ has designated the \_\_\_\_\_ household to receive a set of 10 iron sheets. The materials are funded by and distributed in cooperation with a group of international donors, represented by the officer whose signature appears below.

Sincerely,

\_\_\_\_\_  
Donors Representative

Figure SM1.: Example Letter

Note: Figure shows the letter used in the third treatment, which provided chiefs' political superiors with the ability to monitor the distribution of iron sheets.

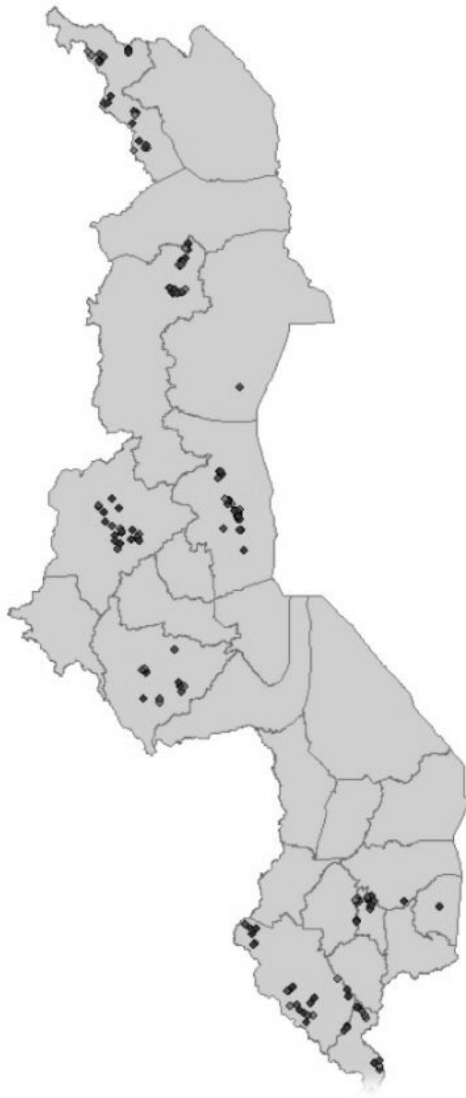

Figure SM2.: Sampled Chiefs

Note: Map shows locations of sampled villages/village chiefs.

Table SM1.: Covariate Balance Across Treatments

|                                                | Treatment Assignment |                    |                      |
|------------------------------------------------|----------------------|--------------------|----------------------|
|                                                | 1                    | 2                  | 3                    |
| <b>Chief's characteristics</b>                 |                      |                    |                      |
| Years as chief                                 | 0.006<br>(0.018)     | 0.010<br>(0.018)   | 0.002<br>(0.018)     |
| Lifelong community resident?                   | -0.919<br>(0.641)    | -0.175<br>(0.676)  | -0.763<br>(0.636)    |
| Work for government?                           | -14.360<br>(850.845) | -1.325<br>(1.333)  | -14.737<br>(874.648) |
| Years education                                | 0.287<br>(0.617)     | 0.808<br>(0.583)   | 0.390<br>(0.597)     |
| Income bracket                                 | 0.098<br>(0.420)     | -0.512<br>(0.454)  | 0.369<br>(0.409)     |
| Support incumbent party?                       | -0.656<br>(0.505)    | -0.218<br>(0.489)  | -0.078<br>(0.481)    |
| Ever traveled outside Malawi?                  | -0.802<br>(0.477)    | -1.183*<br>(0.486) | -0.433<br>(0.471)    |
| <b>Prospective recipients' characteristics</b> |                      |                    |                      |
| Already have iron roofing?                     | 0.523<br>(0.964)     | 0.343<br>(1.005)   | -1.910<br>(1.422)    |
| Community ranks as needy?                      | -1.813<br>(1.363)    | -0.855<br>(1.452)  | -0.977<br>(1.533)    |
| Index of need                                  | 0.159<br>(0.201)     | 0.107<br>(0.203)   | 0.051<br>(0.203)     |
| Constant                                       | 2.080<br>(1.853)     | 0.768<br>(1.926)   | 0.747<br>(1.971)     |
| <i>N</i>                                       | 183                  | 183                | 183                  |

Standard errors in parentheses

\*  $p < 0.05$ , \*\*  $p < 0.01$ , \*\*\*  $p < 0.001$

Table SM2.: Balance between treatments

|                                                | 1 vs. 2             | 1 vs. 3              | 2 vs 3               |
|------------------------------------------------|---------------------|----------------------|----------------------|
| Years as chief                                 | 0.004<br>(0.018)    | -0.004<br>(0.018)    | -0.008<br>(0.019)    |
| Lifelong community resident?                   | 0.731<br>(0.629)    | 0.160<br>(0.594)     | -0.571<br>(0.643)    |
| Work for government?                           | 13.039<br>(859.312) | -0.368<br>(1213.207) | -13.406<br>(856.420) |
| Years education                                | 0.516<br>(0.563)    | 0.096<br>(0.583)     | -0.420<br>(0.557)    |
| Income bracket                                 | -0.622<br>(0.437)   | 0.263<br>(0.395)     | 0.885*<br>(0.438)    |
| Support incumbent party?                       | 0.434<br>(0.506)    | 0.581<br>(0.504)     | 0.148<br>(0.494)     |
| Ever traveled outside Malawi?                  | -0.372<br>(0.500)   | 0.378<br>(0.493)     | 0.749<br>(0.506)     |
| <b>Prospective recipients' characteristics</b> |                     |                      |                      |
| Already have iron roofing                      | -0.184<br>(0.938)   | -2.383<br>(1.359)    | -2.199<br>(1.406)    |
| Community ranks as needy?                      | 0.940<br>(1.208)    | 0.828<br>(1.323)     | -0.112<br>(1.430)    |
| Index of need                                  | -0.040<br>(0.192)   | -0.109<br>(0.195)    | -0.069<br>(0.199)    |
| _cons                                          | -1.280<br>(1.727)   | -1.304<br>(1.817)    | -0.024<br>(1.904)    |
| <i>N</i>                                       | 183                 | 183                  | 183                  |

Standard errors in parentheses

\*  $p < 0.05$ , \*\*  $p < 0.01$ , \*\*\*  $p < 0.001$

## SM2. Robustness Checks

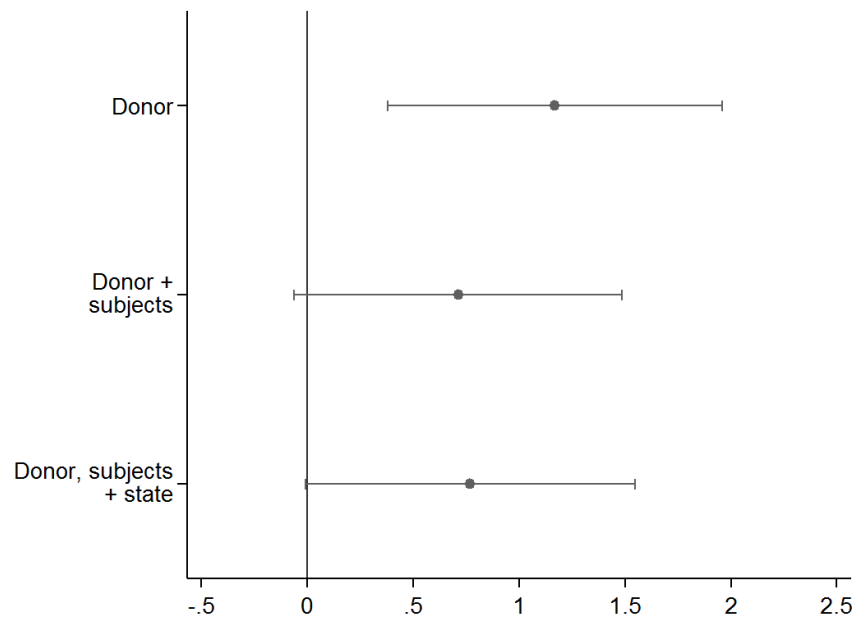

Figure SM3.: Treatment Effect on Average Need of Recipient, by Monitoring Principal(s)

Note: Figure shows average need of recipient, by treatment, with 95% confidence intervals. Need is a six-point scale that includes whether the recipient household: owns iron roofing, permanent brick walls, livestock, or a bicycle; is headed by an elderly person or a child; and cares for orphans. Higher scores indicate more need. Scores are reported by community informants not from the recipient households.

Table SM3.: Effects of monitoring by each principal

|                                     | (1)                            | (2)                            |
|-------------------------------------|--------------------------------|--------------------------------|
| Treat incl. donor monitoring        | -0.814 <sup>†</sup><br>(0.454) | -0.938 <sup>†</sup><br>(0.490) |
| Treat incl. citizen monitoring      | 0.172<br>(0.455)               | 0.343<br>(0.484)               |
| Treat incl. monitoring by superiors | -0.124<br>(0.458)              | -0.236<br>(0.488)              |
| Years as chief                      |                                | 0.00407<br>(0.0145)            |
| Lifelong community resident?        |                                | 0.0518<br>(0.504)              |
| Years education                     |                                | 0.258<br>(0.463)               |
| Income bracket                      |                                | 0.308<br>(0.345)               |
| Work for government?                |                                | -0.160<br>(1.537)              |
| Support incumbent party?            |                                | 0.350<br>(0.388)               |
| Ever traveled outside Malawi?       |                                | -0.0499<br>(0.388)             |
| Constant                            | -0.504<br>(0.420)              | -1.320<br>(1.038)              |
| <i>N</i>                            | 199                            | 188                            |

Standard errors in parentheses

\*  $p < 0.05$ , \*\*  $p < 0.01$ , \*\*\*  $p < 0.001$

Table SM4.: Results using need index rather than subjective assessment of need

|                                     | (1)                  | (2)                 |
|-------------------------------------|----------------------|---------------------|
| [1em] Treatment One                 | 0.956**<br>(0.321)   |                     |
| Treatment Two                       | 0.482<br>(0.315)     |                     |
| Treatment Three                     | 0.537<br>(0.316)     |                     |
| Treatment incl. donor monitoring    |                      | 0.842**<br>(0.317)  |
| Treatment incl. citizen monitoring  |                      | -0.397<br>(0.321)   |
| Treatment incl. top-down monitoring |                      | 0.0735<br>(0.322)   |
| Years as chief                      | 0.000962<br>(0.0101) | 0.00170<br>(0.0102) |
| Lifelong                            | 0.103<br>(0.334)     | 0.0877<br>(0.335)   |
| Income bracket                      | -0.0138<br>(0.226)   | -0.0203<br>(0.227)  |
| Years education                     | 0.0251<br>(0.294)    | -0.0309<br>(0.295)  |
| Supports incumbent party?           | -0.141<br>(0.263)    | -0.143<br>(0.265)   |
| Works for government?               | 0.466<br>(0.924)     | 0.459<br>(0.929)    |
| Constant                            | 1.372*<br>(0.670)    | 1.473*<br>(0.668)   |
| <i>N</i>                            | 192                  | 192                 |

Standard errors in parentheses

\*  $p < 0.05$ , \*\*  $p < 0.01$ , \*\*\*  $p < 0.001$

Table SM5.: Chief's choice to allocate sheets to relative

|                                                 | (1)                  | (2)               | (3)                |
|-------------------------------------------------|----------------------|-------------------|--------------------|
| Treatment One<br>(Donor only)                   | 0.000<br>(0.737)     | -0.119<br>(0.798) |                    |
| Treatment Two<br>(Donor, citizens)              | 1.595**<br>(0.606)   | 1.660*<br>(0.689) |                    |
| Treatment Three<br>(Donor, citizens, superiors) | 1.177<br>(0.623)     | 1.262<br>(0.704)  |                    |
| Treatment incl. donor monitoring                |                      |                   | -0.139<br>(0.797)  |
| Treatment incl. citizen monitoring              |                      |                   | 1.788**<br>(0.691) |
| Treatment incl. top-down monitoring             |                      |                   | -0.399<br>(0.572)  |
| Years as chief                                  |                      | -0.003<br>(0.022) | -0.003<br>(0.022)  |
| Lifelong resident of community?                 |                      | 1.236<br>(1.150)  | 1.236<br>(1.149)   |
| Years education                                 |                      | -0.572<br>(0.830) | -0.568<br>(0.831)  |
| Income bracket                                  |                      | 0.360<br>(0.431)  | 0.362<br>(0.432)   |
| Work for government?                            |                      | 0.000<br>(.)      | 0.000<br>(.)       |
| Support incumbent party?                        |                      | -1.046<br>(0.707) | -1.047<br>(0.707)  |
| Ever traveled outside Malawi?                   |                      | -0.770<br>(0.592) | -0.771<br>(0.592)  |
| Constant                                        | -2.442***<br>(0.521) | -3.173<br>(1.782) | -3.168<br>(1.775)  |
| <i>N</i>                                        | 200                  | 185               | 185                |

Standard errors in parentheses

\*  $p < 0.05$ , \*\*  $p < 0.01$ , \*\*\*  $p < 0.001$



Figure SM4.: Allocation to Recipient Related to Chief, by Monitoring Principal(s)

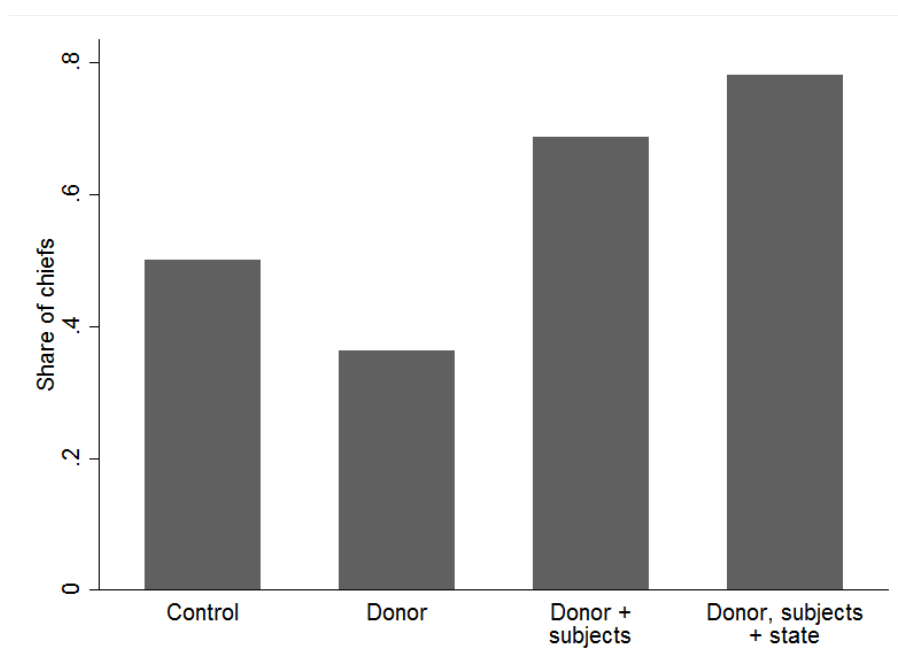

Note: Figure shows share of recipients who are related to the chief, by treatment. Relationships were reported by local informants not themselves related to the chief.
